# Supplementary material for: MYC promotes immune-suppression in triple-negative breast cancer via inhibition of interferon signaling
Source: PubMed Central journal article supplement (PMC9630413; doi:10.1038/s41467-022-34000-6), 2022-11-02
Supplement: 41467_2022_34000_MOESM3_ESM.pdf [file 41467_2022_34000_MOESM3_ESM.pdf]

## **Description of Additional Supplementary Files**

File Name: Supplementary Data 1

Description: RNA-seq results

File Name: Supplementary Data 2

Description: overlay Chip-seq and RNA-seq
